# Supplementary material for: Isonitrile-Derivatized Indole as an Infrared Probe for Hydrogen-Bonding Environments
Source: MDPI journal article supplement (doi:10.3390/molecules24071379), 2019-04-08

Supplementary Material for:

Isonitrile Derivatized Indole as an Infrared Probe for Hydrogen-bonding Environments

Figure S1 The NC stretching frequencies of 5ICI *versus* solvent parameter  $\alpha$  or  $\beta$ . Only frequencies obtained in protic solvents ( $\alpha \neq 0$ ) were used.

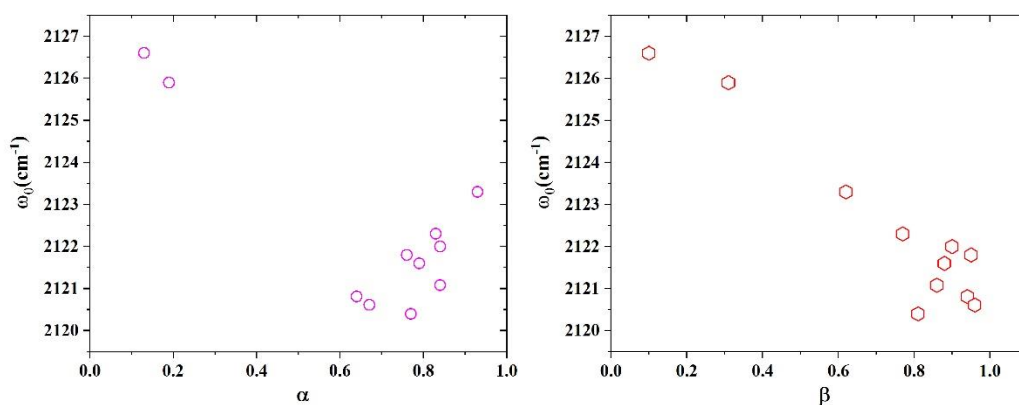

Figure S2 The NC stretching frequencies of 5ICI *versus* solvent parameter  $\pi^*$  or  $\beta$ . Only frequencies obtained in aprotic solvents ( $\alpha = 0$ ) were used.

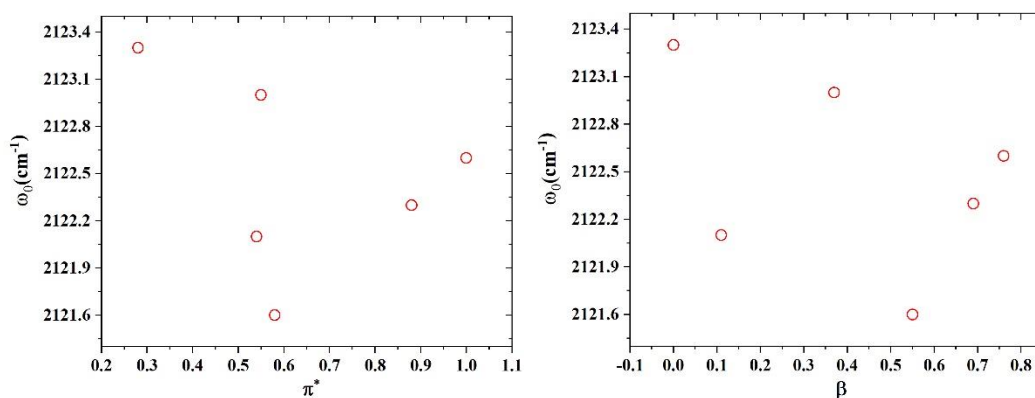

**Figure S3** The NC stretching frequencies of 5ICI in various solvents *versus* Kamlet-Taft empirical parameter  $\pi^*$ ,  $\beta$ , or  $\alpha$ .

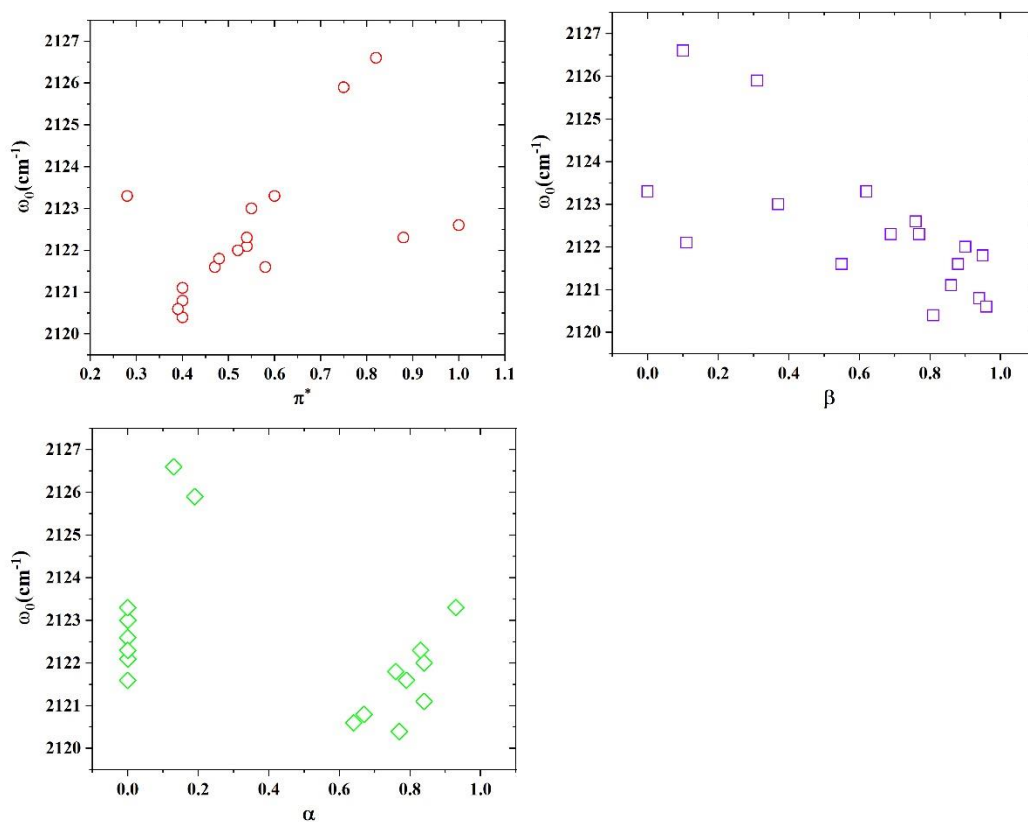

**Figure S4** The NC stretching frequencies of NM5ICI *versus* the density of hydrogen-bond donor groups (mol/mL) in solvents ( $R^2=0.99$ ).

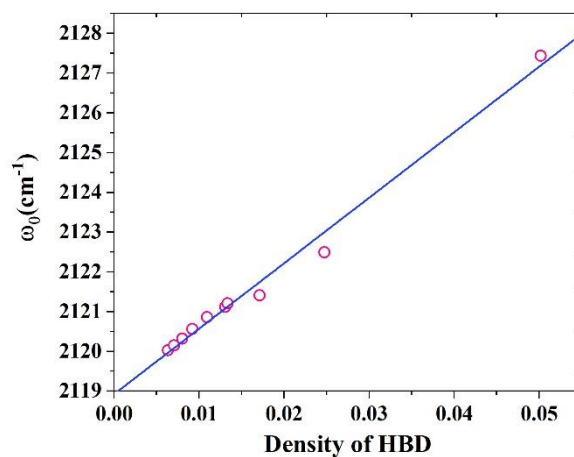

**Figure S5** The NC stretching frequencies of H-bonded NC group *versus* Kamlet-Taft empirical parameter  $\pi^*$ ,  $\beta$ , or  $\alpha$ . Only frequencies obtained in protic solvents ( $\alpha \neq 0$ ) were used.

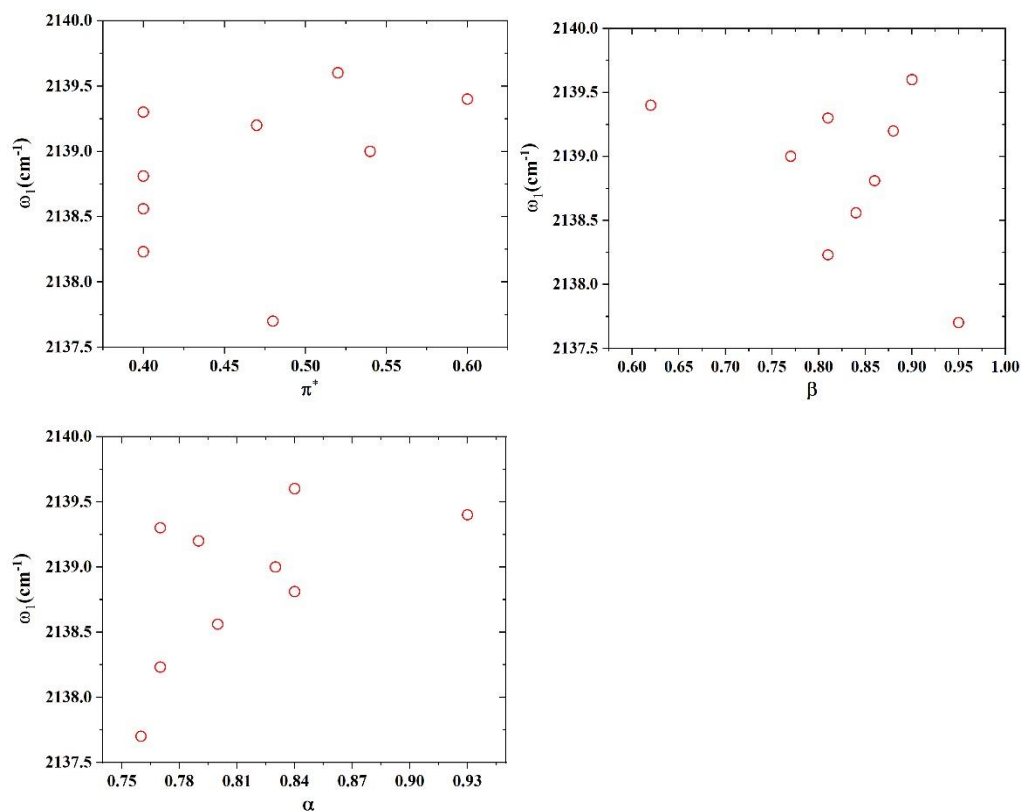

**Figure S6** The NC stretching frequencies of H-bonded NC group *versus* the density of hydrogen bond donors of solvents.

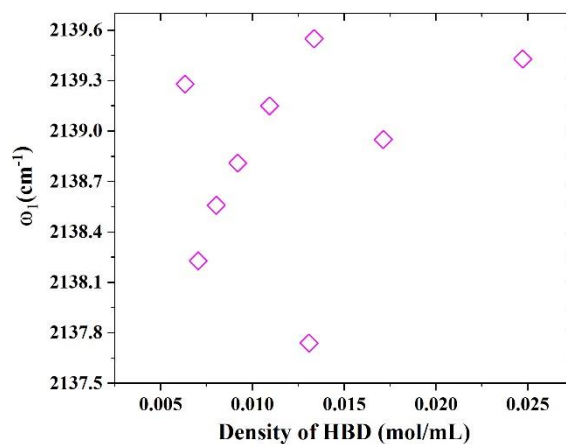

**Figure S7.** The NC stretching vibration of NM5ICI in selected solvents.

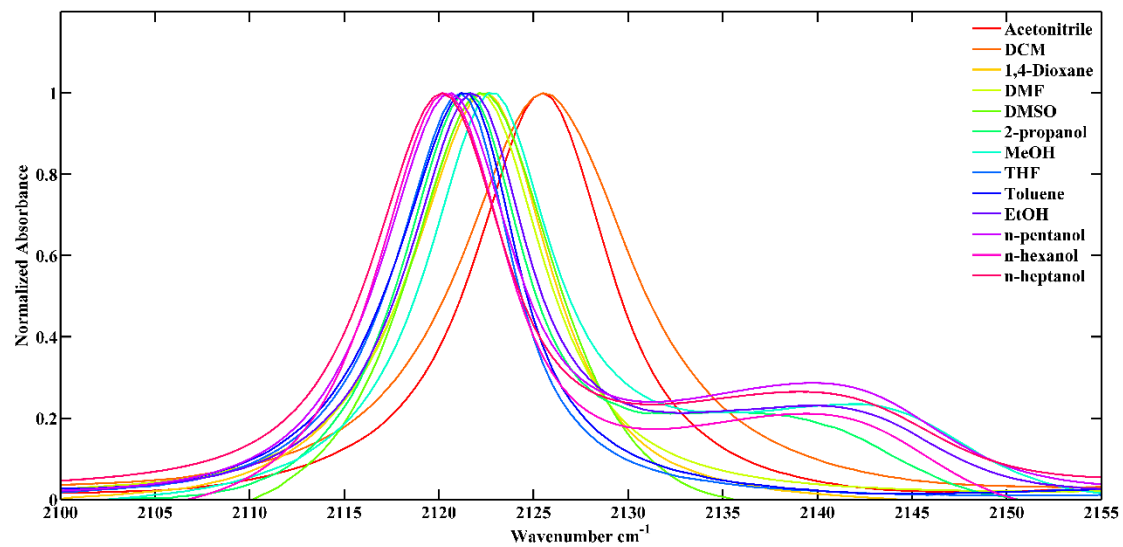

Supplement: s1 [file s1]
